# Supplementary material
Source: Elsevier journal article supplement (https://www.sciencedirect.com/science/article/pii/S0213911113001957)
Supplement: mmc1 [file S0213911113001957:mmc1.pdf]

## Definitions of hospital discharge, severe injury and death from traffic injuries

Katherine Pérez<sup>a,b,c,\*</sup>, María Seguí-Gómez<sup>d</sup>, Vita Arrufat<sup>e</sup>, Eneko Barberia<sup>f</sup>, Elena Cabeza<sup>g</sup>, Eva Cirera<sup>h</sup>, Mercedes Gil<sup>i</sup>, Carlos Martín<sup>j</sup>, Ana M. Novoa<sup>a,b,c</sup>, Marta Olabarría<sup>a,b,c</sup>, Pablo Lardelli<sup>k</sup>, Josep Maria Suelves<sup>l</sup>, Elena Santamariña-Rubio<sup>a,b,c</sup> Spanish Epidemiological Society Working Group for Measurement of the Health Impact of Traffic Injuries in Spain.

a Agència de Salut Pública de Barcelona, Barcelona (ASPB), España

b CIBER de Epidemiología y Salud Pública (CIBERESP), España

c Institut d'Investigació Biomèdica Sant Pau (IIB Sant Pau), Barcelona, España

d Dirección General de Tráfico (DGT), España

e Centre de Salut Pública, Castellón, España

f Institut de Medicina Legal de Catalunya, España

g Departament de Salut, Illes Balears, España

h Universitat de Vic, España

i Dirección General de Salud Pública, Canarias, España

j Unitat de Suport a la Recerca Barcelona, IDIAP Jordi Gol, Barcelona, España

k Universidad de Granada, España

l Agència de Salut Pública de Catalunya, Barcelona, España

\*Autor for correspondence: email: [cperez@aspb.cat](mailto:cperez@aspb.cat) (K. Pérez).

Recommended citation: Pérez K, et al. Definición de alta hospitalaria, lesión grave y muerte por lesiones por tráfico. Gac Sanit. 2013. <http://dx.doi.org/10.1016/j.gaceta.2013.10.006>.

### Abstract

Road traffic injury surveillance involves methodological difficulties due, among other reasons, to the lack of consensus criteria for case definition. Police records have usually been the main source of information for monitoring traffic injuries, while health data has hardly been used. Police records normally include comprehensive information on the characteristics of the crash, but often underreport injury cases and do not collect reliable information on the severity of injuries. However, statistics on severe traffic injuries have been based almost exclusively on police data. The aim of this paper is to propose criteria based on medical records to define: a) "Hospital discharge for traffic injuries", b) "Person with severe traffic injury", and c) "Death from traffic injuries" in order to homogenize the use of these sources.

### Keywords

Traffic accidents, Injury, Injury Severity, Health Information Systems, Selection Criteria

### Background

Road traffic injury surveillance involves methodological difficulties due, among other reasons, to the lack of consensus criteria for case definition. The Spanish General Directorate of Traffic (DGT)<sup>1</sup> in accordance with Eurostat<sup>2</sup> defines: Road traffic collision with victims: collision occurring or starting on a road which is object of motor vehicle traffic and road safety legislation (public road), involving at least one vehicle in motion, and which results in the death and/or injury of one or more people; Severely injured: any person injured in a traffic collision and who requires hospitalization for at least 24 hours; Killed: any person who, as the result of a traffic collision, is killed instantly or dies sometime in the next thirty days. The DGT estimates deaths at 30 days<sup>3</sup> and has been using a new method<sup>1</sup> since 2011. Monitoring of traffic injuries has usually been done using police records rather than health data

which has hardly been used. Police records provide information about characteristics of the collision, but under-report persons injured and do not collect reliable information about injury severity. Despite this, statistics about severely injured have been almost exclusively based on police data. Health data sources, such as the Hospital Discharge Register (HDR) and death registries provide information about injury diagnoses and thus complement police statistics. They code diagnoses using the International Classification of Diseases, although there are discrepancies about which codes to include in order to define an injury as traffic related. In a previous publication, the Spanish Epidemiological Society Working Group for the Measurement of Health Impact of Traffic Injuries in Spain (GTL-SEE) proposed some criteria for defining a hospital discharge for traffic injury<sup>4</sup>, but which these ought to be

revised. In this methodological note, our aim is to propose criteria to define:

- a) “Hospital discharge for traffic injuries”,
- b) “Person with severe traffic injury, and
- c) “Death from traffic injuries”,

based on medical records in order to homogenize the use of these sources.

### Proposed definition criteria

Due to the term “accident” having connotations of an event which is unpredictable and unavoidable, we propose to use the expressions “collision”, “road traffic injuries” or just “traffic injuries”.

Following a review of recommendations by the Centers for Disease Control<sup>5</sup>, the Pan American Health Organization<sup>6</sup>, the World Health Organization<sup>7</sup>, Spanish National Institute of Statistics, and having assessed agreement with DGT criteria, we propose the following criteria (table 1):

#### A. Hospital discharge for traffic injuries

With the aim of only considering new (incident) cases, scheduled hospital admissions (non urgent) and readmissions are excluded from the definition, and only cases in which traumatic injury is mentioned in the main diagnosis are included. If all cases with a diagnosis of traumatic injury (whether main or secondary) were to be included, this would produce an overestimate as victims admitted to hospital for other reasons in the future, would be counted more than once. For example, in a person with spinal cord injury, this diagnosis would always reappear in their successive hospitalizations for other causes.

Traumatic injury includes diagnoses with the following ICD9-CM codes (International Classification of Diseases-Clinical Modification, 9th revision): N800-N904, N910-N957, N959. These include fracture, dislocation, sprain, internal injury, open wound, injury to blood vessel, superficial injury, contusion, crushing, foreign body entering through body orifice, burns, and injury to nerves and spinal cord. It excludes late effects of injury (N905-N909), early complications of physical trauma (N958), poisoning (N960-979), toxic effects (N980-989) and other and unspecified external injuries (N990-999)<sup>8</sup>. It also includes the following external causes (E-codes): “Motor vehicle traffic accident” (E810-819) and “Pedal cycle accident” (E826), but excludes “Animal-drawn vehicle accident” (E827), “Accident involving an animal being ridden”, (E828), “Other road vehicle accident” (E829), “Suicide and self-

inflicted injury by crashing of motor vehicle” (E958.5) and “Injury by crashing of motor vehicle, undetermined whether accidentally or purposely inflicted” (E988.5), in which it is not clear whether they occur on public roads and hence whether they can be considered a “road traffic collision”. In any case these represent a small percentage. According to Eurostat, suicide or a suicide attempt is not accidental, but rather caused by an action to deliberately self-inflict fatal injuries<sup>2</sup>.

As the E-codes are not always well-reported in the HDR, accident compensation payment codes are also checked to see if the payer is a traffic accident insurance company. Assuming that mistakes are more likely in coding of diagnoses than in insurance payer codes, when an E-code appears which is not traffic-related, but the payer is a traffic accident insurance company, it is accepted as a case, provided the other criteria are met.

The present proposal defines more precisely and improves the earlier GTL-SEE proposal in three aspects: previously, all cases were included in which a traumatic injury was mentioned in any diagnosis (not just the main diagnosis); injury codes N800-N959.9 were all included, i.e. late effects of injury (N905-909), and early complications of injury (N958) were not excluded; furthermore, readmissions were not excluded.

#### B. Person with severe traffic injury

In 2010 IRTAD (International Traffic Safety Data and Analysis Group, Joint Transport International Forum, OECD), proposed using MAIS  $\geq 3$  (Maximum Abbreviated Injury Scale)<sup>9</sup> as the criteria for “severe” injury. MAIS is the maximum value of the AIS (Abbreviated Injury Scale), which assigns a level of severity to each injury, ranging from 1 (slight) to 6 (potentially fatal)<sup>10</sup>. To implement this proposal would require using hospital discharge records to complement police sources. Recently, the European Commission has also adopted this definition, which must now be incorporated in statistics of the European CARE registry (Community Road Accident Database).

#### C. Death from traffic injuries

There are multiple definitions of death due to traffic injuries. According to the ICD10 (International Classification of Diseases, tenth revision), “A transport accident (V01-V99) is any accident involving a device designed

primarily for, or being used at the time primarily for, conveying persons or goods from one place to another". The ICD10 distinguishes between "Traffic accident" (any vehicle accident on a public road) and "Non-traffic accident" (any vehicle accident occurring entirely somewhere other than on a public road). In order to homogenize criteria we propose considering deaths from traffic injuries those occurring on public roads, as the DGT and international organizations propose, thus excluding the non-traffic deaths. (Table 1).

### **Trends in hospital discharges for traffic injuries and in numbers of persons severely injured in Spain, 2000-2011**

Applying the above criteria, the numbers of hospital discharges for traffic injuries decreased from 41,561 in 2000 to 22,558 in 2011 (Table 2) (Source: HDR provided by the Information Service of the Spanish Ministry of Health, Social Services and Equality). Approximately one third of the annual totals of hospital discharges for traffic injuries have a MAIS  $\geq 3$ .

### **Declaration of authorship**

KP and MSG conceived the idea. KP analysed the data and wrote the first draft. All authors have contributed to the interpretation of the data, writing of the article, and have approved publication of the final version.

**Funding:** None

### **Acknowledgements**

Our thanks to María Ángeles Gogorcena Aoiz, of the Instituto de Información Sanitaria. Ministerio de Sanidad, Servicios Sociales e Igualdad, to Pilar Zori from de Dirección General de Tráfico, and to Dolores Martos and Maica Rodríguez, of the Agència de Salut Pública de Barcelona.

**Conflicts of Interests:** None

## **References**

- <sup>1</sup> Dirección General de Tráfico. Las principales cifras de la siniestralidad vial. España 2011. Madrid 2012.  
[Consultado el 19/09/2013]. Disponible en: [http://www.dgt.es/was6/portal/contenidos/es/seguridad\\_vial/estadistica/publicaciones/princip\\_cifras\\_siniestral/cifras\\_siniestralidad1013.pdf](http://www.dgt.es/was6/portal/contenidos/es/seguridad_vial/estadistica/publicaciones/princip_cifras_siniestral/cifras_siniestralidad1013.pdf)
- <sup>2</sup> Glosario de Estadísticas de Transporte. UNECE-Eurostat-ITF (Internacional Transport Forum). Comisión Económica para Europa. 4a edición. [Consultado el 19/09/2013]. Disponible en: [http://ec.europa.eu/eurostat/ramon/coded\\_files/transport\\_glossary\\_4\\_ed\\_ES.pdf](http://ec.europa.eu/eurostat/ramon/coded_files/transport_glossary_4_ed_ES.pdf)
- <sup>3</sup> Pérez K, Cirera E, Borrell C, Plasencia A. [Motor vehicle crash fatalities at 30 days in Spain]. *Gac Sanit*. 2006;20:108-15.
- <sup>4</sup> Pérez C, Cirera E y Grupo de trabajo sobre la medida del impacto en la salud de los accidentes de tráfico en España. Indicadores de morbilidad y mortalidad de lesión por accidente de tráfico. Ministerio de Sanidad y Consumo. Madrid 2007. NIPO: 351-07-045-2. [Consultado el 19/09/2013]. Disponible en: <http://www.msssi.gob.es/profesionales/saludPublica/prevPromocion/Lesiones/docs/INDICADORES.pdf>
- <sup>5</sup> Centers for Disease Control and Prevention. Recommended framework for presenting injury mortality data. (No. RR-14) *MMWR* 1997;46. [Consultado el 19/09/2013]. Disponible en: <http://www.cdc.gov/mmwr/pdf/rr/rr4614.pdf>
- <sup>6</sup> Guía para la vigilancia epidemiológica de violencia y lesiones. PAHO. [Consultado el 19/09/2013]. Disponible en: <http://www.paho.org/Spanish/HCP/HCN/VIO/guidelines.htm>
- <sup>7</sup> Classification Systems. Violence and Injury Prevention, World Health Organisation. [Consultado el 19/09/2013]. Disponible en: [http://www.who.int/violence\\_injury\\_prevention/surveillance/classification/en/index.html](http://www.who.int/violence_injury_prevention/surveillance/classification/en/index.html)
- <sup>8</sup> Smith GS, Langlois JA, Buechner JS. Methodological issues in using hospital discharge data to determine the incidence of hospitalized injuries. *Am J Epidemiol*. 1991;134:1146-58.
- <sup>9</sup> Amorós E, Brosnan M, Wegman F, et al. Reporting on Serious Road Traffic Casualties. Combining and using different data sources to improve understanding of non-fatal road traffic crashes. IRTAD. 2011. [Consultado el 19/09/2013]. Disponible en: <http://internationaltransportforum.org/irtadpublic/pdf/Road-Casualties-Web.pdf>
- <sup>10</sup> States J. The Abbreviated and the Comprehensive Research Injury Scales. In: STAPP Car Crash Journal. 13, Society of Automotive Engineers, Inc., New York 1969, ISSN 1532-8546, S. 282-294, LCCN 67-22372.

Table 1. Criteria for *Hospital discharge for traffic injuries*, for *Person with severe traffic injury*, and for *Death from traffic injuries*.

| <b>A. Hospital discharge for traffic injuries (ICD9-CM): must meet criteria 1, 2, 3 and 4:</b><br><b>1. Emergency admission.</b> (Scheduled admissions are excluded)<br><b>2. No readmission.</b> (Readmission meaning a new episode of hospitalization within 30 days for the same cause as the primary admission)<br><b>3. Code for Traumatic Injury in the main diagnosis</b> (ICD9-CM Codes: N800-N904, N910-N957, N959).<br><b>4. Either or both of the following criteria:</b><br><b>4.1. E-code</b> for external cause according to ICD9-CM: <b>E810-819, E826.</b><br><b>4.2. Accident compensation payer:</b> "Traffic accident insurance company". |                                        |                                                                                    |
|--------------------------------------------------------------------------------------------------------------------------------------------------------------------------------------------------------------------------------------------------------------------------------------------------------------------------------------------------------------------------------------------------------------------------------------------------------------------------------------------------------------------------------------------------------------------------------------------------------------------------------------------------------------|----------------------------------------|------------------------------------------------------------------------------------|
| <b>B. Person with severe traffic injury:</b><br>Any person meeting the following criteria is to be considered "severely injured":<br><b>1.</b> Meet criteria for Hospital discharge for traffic injuries, as established in the previous section, and<br><b>2.</b> Any of the diagnosed injuries receives a score $\geq 3$ on the Maximum Abbreviated Injury Scale (MAIS) <sup>1</sup> .                                                                                                                                                                                                                                                                     |                                        |                                                                                    |
| <b>C. Death from traffic injuries (ICD10):</b>                                                                                                                                                                                                                                                                                                                                                                                                                                                                                                                                                                                                               | Death from <b>Traffic</b> injuries     | Death from <b>non-traffic</b> transport injuries<br>(Did not occur on public road) |
| Pedestrian:                                                                                                                                                                                                                                                                                                                                                                                                                                                                                                                                                                                                                                                  |                                        |                                                                                    |
| V01 - V06                                                                                                                                                                                                                                                                                                                                                                                                                                                                                                                                                                                                                                                    | .1, .9                                 | .0                                                                                 |
| V09                                                                                                                                                                                                                                                                                                                                                                                                                                                                                                                                                                                                                                                          | .2, .3                                 | .0, .1, .9                                                                         |
| Pedal cyclist:                                                                                                                                                                                                                                                                                                                                                                                                                                                                                                                                                                                                                                               |                                        |                                                                                    |
| V10 - V18                                                                                                                                                                                                                                                                                                                                                                                                                                                                                                                                                                                                                                                    | .4, .5, .9                             | .0, .1, .2, .3                                                                     |
| V19                                                                                                                                                                                                                                                                                                                                                                                                                                                                                                                                                                                                                                                          | .4, .5, .6, .9                         | .0, .1, .2, .3, .8                                                                 |
| Motorcycle rider:                                                                                                                                                                                                                                                                                                                                                                                                                                                                                                                                                                                                                                            |                                        |                                                                                    |
| V20 - V28                                                                                                                                                                                                                                                                                                                                                                                                                                                                                                                                                                                                                                                    | .4, .5, .9                             | .0, .1, .2, .3                                                                     |
| V29                                                                                                                                                                                                                                                                                                                                                                                                                                                                                                                                                                                                                                                          | .4, .5, .6, .9                         | .0, .1, .2, .3, .8                                                                 |
| Occupant of three-wheeled motor vehicle:                                                                                                                                                                                                                                                                                                                                                                                                                                                                                                                                                                                                                     |                                        |                                                                                    |
| V30 - V38                                                                                                                                                                                                                                                                                                                                                                                                                                                                                                                                                                                                                                                    | .5, .6, .7, .9                         | .0, .1, .2, .3, .4                                                                 |
| V39                                                                                                                                                                                                                                                                                                                                                                                                                                                                                                                                                                                                                                                          | .4, .5, .6, .9                         | .0, .1, .2, .3, .8                                                                 |
| Car occupant:                                                                                                                                                                                                                                                                                                                                                                                                                                                                                                                                                                                                                                                |                                        |                                                                                    |
| V40 - V48                                                                                                                                                                                                                                                                                                                                                                                                                                                                                                                                                                                                                                                    | .5, .6, .7, .9                         | .0, .1, .2, .3, .4                                                                 |
| V49                                                                                                                                                                                                                                                                                                                                                                                                                                                                                                                                                                                                                                                          | .4, .5, .6, .9                         | .0, .1, .2, .3, .8                                                                 |
| Occupant of pick-up truck or van:                                                                                                                                                                                                                                                                                                                                                                                                                                                                                                                                                                                                                            |                                        |                                                                                    |
| V50 - V58                                                                                                                                                                                                                                                                                                                                                                                                                                                                                                                                                                                                                                                    | .5, .6, .7, .9                         | .0, .1, .2, .3, .4                                                                 |
| V59                                                                                                                                                                                                                                                                                                                                                                                                                                                                                                                                                                                                                                                          | .5, .6, .9                             | .0, .1, .2, .3, .8                                                                 |
| Occupant of heavy transport vehicle:                                                                                                                                                                                                                                                                                                                                                                                                                                                                                                                                                                                                                         |                                        |                                                                                    |
| V60 - V68                                                                                                                                                                                                                                                                                                                                                                                                                                                                                                                                                                                                                                                    | .5, .6, .7, .9                         | .0, .1, .2, .3, .4                                                                 |
| V69                                                                                                                                                                                                                                                                                                                                                                                                                                                                                                                                                                                                                                                          | .4, .5, .6, .9                         | .0, .1, .2, .3, .8                                                                 |
| Bus occupant:                                                                                                                                                                                                                                                                                                                                                                                                                                                                                                                                                                                                                                                |                                        |                                                                                    |
| V70 - V78                                                                                                                                                                                                                                                                                                                                                                                                                                                                                                                                                                                                                                                    | .5, .6, .7, .9                         | .0, .1, .2, .3, .4                                                                 |
| V79                                                                                                                                                                                                                                                                                                                                                                                                                                                                                                                                                                                                                                                          | .4, .5, .6, .9                         | .0, .1, .2, .3, .8                                                                 |
| Animal-rider or occupant of animal-drawn vehicle                                                                                                                                                                                                                                                                                                                                                                                                                                                                                                                                                                                                             |                                        |                                                                                    |
| V80                                                                                                                                                                                                                                                                                                                                                                                                                                                                                                                                                                                                                                                          | -                                      | .1, .2, .3, .4, .5, .7, .9                                                         |
| Occupant of railway train or railway vehicle:                                                                                                                                                                                                                                                                                                                                                                                                                                                                                                                                                                                                                |                                        |                                                                                    |
| V81                                                                                                                                                                                                                                                                                                                                                                                                                                                                                                                                                                                                                                                          | .1                                     | .0, .2, .3, .4, .5, .6, .7, .8, .9                                                 |
| Occupant of streetcar:                                                                                                                                                                                                                                                                                                                                                                                                                                                                                                                                                                                                                                       |                                        |                                                                                    |
| V82                                                                                                                                                                                                                                                                                                                                                                                                                                                                                                                                                                                                                                                          | .1, .9                                 | .0, .2, .3, .4, .5, .6, .7, .8                                                     |
| Occupant of special industrial vehicle:                                                                                                                                                                                                                                                                                                                                                                                                                                                                                                                                                                                                                      |                                        |                                                                                    |
| V83                                                                                                                                                                                                                                                                                                                                                                                                                                                                                                                                                                                                                                                          | .0, .1, .2, .3                         | .4, .5, .6, .7, .9                                                                 |
| Occupant of special agricultural vehicle:                                                                                                                                                                                                                                                                                                                                                                                                                                                                                                                                                                                                                    |                                        |                                                                                    |
| V84                                                                                                                                                                                                                                                                                                                                                                                                                                                                                                                                                                                                                                                          | .0, .1, .2, .3                         | .4, .5, .6, .7, .9                                                                 |
| Other:                                                                                                                                                                                                                                                                                                                                                                                                                                                                                                                                                                                                                                                       |                                        |                                                                                    |
| V85 - V86                                                                                                                                                                                                                                                                                                                                                                                                                                                                                                                                                                                                                                                    | .0, .1, .2, .3                         | .4, .5, .6, .7, .9                                                                 |
| V87                                                                                                                                                                                                                                                                                                                                                                                                                                                                                                                                                                                                                                                          | .0, .1, .2, .3, .4, .5, .6, .7, .8, .9 | -                                                                                  |
| V88                                                                                                                                                                                                                                                                                                                                                                                                                                                                                                                                                                                                                                                          | -                                      | .0, .1, .2, .3, .4, .5, .6, .7, .8, .9                                             |
| Type of vehicle not specified:                                                                                                                                                                                                                                                                                                                                                                                                                                                                                                                                                                                                                               |                                        |                                                                                    |
| V89                                                                                                                                                                                                                                                                                                                                                                                                                                                                                                                                                                                                                                                          | .2, .3                                 | .0, .1, .9                                                                         |

Table 2. Hospital discharges for traffic injuries, by external cause E-code, accident compensation payer, and severity. HDR Spain, 2000-2011.

|      | Traumatic injury, and E-code for collision of motorized vehicle or bicycle | Traumatic injury, and compensation payment by "Traffic accident insurance company" | Traumatic injury, compensation payment by "Traffic accident insurance company", and E-code for collision of motorized vehicle or bicycle | Total         | Hospital discharge for traffic injuries and Severity of MAIS $\geq 3$ |      |
|------|----------------------------------------------------------------------------|------------------------------------------------------------------------------------|------------------------------------------------------------------------------------------------------------------------------------------|---------------|-----------------------------------------------------------------------|------|
| Year | n                                                                          | n                                                                                  | n                                                                                                                                        | n             | n                                                                     | %    |
| 2000 | 13,933                                                                     | 6,299                                                                              | 21,329                                                                                                                                   | <b>41,561</b> | 14,298                                                                | 34.4 |
| 2001 | 9,468                                                                      | 6,457                                                                              | 17,780                                                                                                                                   | <b>33,705</b> | 12,171                                                                | 36.1 |
| 2002 | 10,334                                                                     | 7,805                                                                              | 18,281                                                                                                                                   | <b>36,420</b> | 13,045                                                                | 35.8 |
| 2003 | 7,662                                                                      | 11,803                                                                             | 14,479                                                                                                                                   | <b>33,944</b> | 12,569                                                                | 37.0 |
| 2004 | 7,479                                                                      | 10,313                                                                             | 13,475                                                                                                                                   | <b>31,267</b> | 11,835                                                                | 37.9 |
| 2005 | 7,161                                                                      | 10,067                                                                             | 13,387                                                                                                                                   | <b>30,615</b> | 11,715                                                                | 38.3 |
| 2006 | 7,391                                                                      | 8,973                                                                              | 11,987                                                                                                                                   | <b>28,351</b> | 10,898                                                                | 38.4 |
| 2007 | 6,737                                                                      | 9,031                                                                              | 11,686                                                                                                                                   | <b>27,454</b> | 10,464                                                                | 38.1 |
| 2008 | 8,246                                                                      | 5,316                                                                              | 12,668                                                                                                                                   | <b>26,230</b> | 9,862                                                                 | 37.6 |
| 2009 | 8,568                                                                      | 5,008                                                                              | 11,768                                                                                                                                   | <b>25,344</b> | 9,205                                                                 | 36.3 |
| 2010 | 7,689                                                                      | 5,482                                                                              | 9,485                                                                                                                                    | <b>22,656</b> | 8,315                                                                 | 36.7 |
| 2011 | 8,520                                                                      | 3,228                                                                              | 10,810                                                                                                                                   | <b>22,558</b> | 8,390                                                                 | 37.2 |

MAIS: Maximum Abbreviated Injury Scale
